# Supplementary material for: Photoinactivation Efficiency of Cationic Porphyrin Derivatives Against Multidrug-Resistant Wound Pathogens
Source: Research Square preprint supplement (doi:10.21203/rs.3.rs-883644/v1), 2021-09-27
Supplement: Supplementary file 1 [file 4b80c3099cce7cebd600d6aa.docx]

| Supplementary 1. Antibiotic susceptibilities of clinical isolates | | | | | | | | | | | | | | | | | | | | | | | | | | |
| --- | --- | --- | --- | --- | --- | --- | --- | --- | --- | --- | --- | --- | --- | --- | --- | --- | --- | --- | --- | --- | --- | --- | --- | --- | --- | --- |
| Groups |  | **Clinical isolates** | | | | | | | | | | | | | | | | | | | | | | | | |
| **MRSA1** | | | ***Escherichia coli*** | | ***Pseudomonas aeruginosa*** | | | | ***Acinetobacter baumannii*** | | | | | | | | | | | | | | ***Klebsiella pneumoniae*** | |
| **Antibiotics** | 1 | 2 | 3 | 1 | 2 | 1 | 2 | 3 | 4 | 1 | 2 | 3 | 4 | 5 | 6 | 7 | 8 | 9 | 10 | 11 | 12 | 13 | 14 | 1 | 2 |
| Penicillin | Ampicilin | R | R | R | R | R |  |  |  |  |  |  |  |  |  |  |  |  |  |  |  |  |  |  |  |  |
| Cephalosporins | Sefoksitin | R | R | R |  |  |  |  |  |  |  |  |  |  |  |  |  |  |  |  |  |  |  |  |  |  |
| Sefuroksim |  |  |  | R | R |  |  |  |  |  |  |  |  |  |  |  |  |  |  |  |  |  |  | R | R |
| Seftazidim |  |  |  | R | R | R | R | R | R |  |  |  |  |  |  |  |  |  |  |  |  |  |  | R | R |
| Seftriakson |  |  |  | R | R |  |  |  |  |  |  |  |  |  |  |  |  |  |  |  |  |  |  | R | R |
| Sefepim |  |  |  | R | R | R | R | R | R |  |  |  |  |  |  |  |  |  |  |  |  |  |  | R | R |
| Carbapenems | İmipenem |  |  |  | I | R | R | R | R | R | R | R | R | R | R | R | R | R | R | R | R | R | R | R | R | R |
| Meropenem |  |  |  | R | R | R | R | R | R | R | R | R | R | R | R | R | R | R | R | R | R | R | R | R | R |
| Ertapenem |  |  |  | R | R |  |  |  |  |  |  |  |  |  |  |  |  |  |  |  |  |  |  | R | R |
| Monobactam | Aztreonam |  |  |  | R | R | R | R | R | R |  |  |  |  |  |  |  |  |  |  |  |  |  |  | R | R |
| β-Lactamase Inhibitors | Amoksisilin Klavulanat |  |  |  | R | R |  |  |  |  |  |  |  |  |  |  |  |  |  |  |  |  |  |  | R | R |
| Piperacillin/Tazobactam |  |  |  | R | R |  |  |  |  |  |  |  |  |  |  |  |  |  |  |  |  |  |  |  |  |
| Glycopeptides | Vankomisin | S | S | S |  |  |  |  |  |  |  |  |  |  |  |  |  |  |  |  |  |  |  |  |  |  |
| Teicoplanin | S | S | S |  |  |  |  |  |  |  |  |  |  |  |  |  |  |  |  |  |  |  |  |  |  |
| Aminoglycosides | Amikasin |  |  |  | R | S | S | S | S | S | R | R | R | R | R | S | R | R | R | S | R | R | I | R | I | R |
| Netilmisin |  |  |  | R | R |  | R | S | S | R | R | R | R | R | S | R | R | R | R | R | R | S | R |  |  |
| Tetracyclines | Tetrasiklin | R | S | S |  |  |  |  |  |  |  |  |  |  |  |  |  |  |  |  |  |  |  |  |  |  |
| Lincosamides | Klindamisin | S | R | S |  |  |  |  |  |  |  |  |  |  |  |  |  |  |  |  |  |  |  |  |  |  |
| Sulfonamides and Trimethoprim | SMX3 | S | R | S | R | R |  |  |  |  | S | R | R | R | R | R | R | R | S | R | R | R | S | R | S | R |
| Quinolones | Ciprofloksasin | R | R | R | R | R | S | R | S | S | R | R | R | R | R | R | R | R | R | R | R | R | R | R | R | R |
| Polymyxins | Colistin |  |  |  | S | S | S | S | S | S | S | S | S | S | S | S | S | S | S | S | S | S | S | S | S | S |
| 1Methicillin-resistant *Staphylococcus aureus*, Sulfamethoxazole-Trimethoprim, S (Sensitive); I (Intermediate resistant); R (Resistant) | | | | | | | | | | | | | | | | | | | | | | | | | | |
